# Supplementary material for: Self-assembled tetracyanoquinodimethane derivatives: differential fluorescent responses on sensing copper and mercury ions in an aqueous medium
Source: Royal Society of Chemistry journal article supplement (doi:10.1039/d4su00445k), 2024-01-01
Supplement: d4su00445k1.pdf [file d4su00445k1.pdf]

## ***Supplementary Information***

# **Self-Assembled Tetracyanoquinodimethane Derivatives: Differential Fluorescent Responses on Sensing Copper and Mercury Ions in Aqueous Medium**

Anuradha Sureshrao Mohitkar,<sup>a</sup> Nilanjan Dey<sup>b</sup> and Subbalakshmi Jayanty<sup>c\*</sup>

*<sup>a,b,c</sup> Department of Chemistry, Birla Institute of Technology and Science, Pilani-Hyderabad Campus, Jawaharnagar, Kapra Mandal, Hyderabad - 500078, Telangana State, India.*

Correspondence e-mail: [jslakshmi@hyderabad.bits-pilani.ac.in](mailto:jslakshmi@hyderabad.bits-pilani.ac.in)

**S:** *Supplementary information*

## Table of Contents

| Contents                                                                                                                                                                                                                                         | Page No.       |
|--------------------------------------------------------------------------------------------------------------------------------------------------------------------------------------------------------------------------------------------------|----------------|
| <b>Table S1</b> (a) Comparative table of fluorescent probe with varying parameters against metal ion sensing.                                                                                                                                    | <b>S3-S4</b>   |
| <b>Fig. S1</b> (a) Increase of emission intensity with the increase in water fraction (b) effect of viscosity on intensity (c) effect of temperature for <b>[1]</b> .                                                                            | <b>S5</b>      |
| <b>Fig. S2</b> (a) Lowering of emission intensity with the decrease in concentration (b) effect of pH on intensity (c) SEM image for <b>[1]</b> .                                                                                                | <b>S6</b>      |
| <b>Fig. S3 [2]</b> (a) Absorption spectra and (b) emission spectra ( $\lambda_{exc} = 370$ nm) depicting solvatochromism (c) effect of aggregation on emission intensity, (d) lowering of emission intensity with the decrease in concentration. | <b>S7</b>      |
| <b>Fig. S4 [3]</b> (a) Absorption spectra and (b) emission spectra ( $\lambda_{exc} = 375$ nm) depicting solvatochromism (c) effect of aggregation on emission intensity, (d) lowering of emission intensity with the decrease in concentration. | <b>S8</b>      |
| <b>Fig. S5</b> Emission intensity changes with effect of (a) temperature and (b) pH (c) SEM image for <b>[2]</b> .                                                                                                                               | <b>S9</b>      |
| <b>Fig. S6</b> Emission intensity changes with effect of (a) temperature and (b) pH (c) SEM image for <b>[3]</b> .                                                                                                                               | <b>S10</b>     |
| <b>Fig. S7</b> Variation in emission intensity of <b>[2]</b> with increase in (a) $Cu^{2+}$ and (b) $Hg^{2+}$ .<br>Change in absorbance with increase in concentration of (c) $Cu^{2+}$ and (d) $Hg^{2+}$ for <b>[2]</b> .                       | <b>S11</b>     |
| <b>Fig. S8</b> Variation in emission intensity of <b>[3]</b> with increase in (a) $Cu^{2+}$ and (b) $Hg^{2+}$ .<br>Change in absorbance with increase in concentration of (c) $Cu^{2+}$ and (d) $Hg^{2+}$ for <b>[3]</b> .                       | <b>S12</b>     |
| <b>Fig. S9</b> (a) Stern-Volmer plot, (b) $K_{sv}$ calculation, (c) LOD calculation, depicting quenching of <b>[1]</b> on addition of $Cu^{2+}$ ion.                                                                                             | <b>S13</b>     |
| <b>Fig. S10</b> Stern-Volmer plots for (a) $Cu^{2+}$ and (b) $Hg^{2+}$ , $K_{sv}$ calculation (c) $Cu^{2+}$ and (d) $Hg^{2+}$ , LOD calculation (e) $Cu^{2+}$ and (f) $Hg^{2+}$ , for <b>[2]</b> .                                               | <b>S14</b>     |
| <b>Fig. S11</b> Stern-Volmer plots for (a) $Cu^{2+}$ and (b) $Hg^{2+}$ , $K_{sv}$ calculation (c) $Cu^{2+}$ and (d) $Hg^{2+}$ , LOD calculation (e) $Cu^{2+}$ and (f) $Hg^{2+}$ for <b>[3]</b> .                                                 | <b>S15</b>     |
| <b>Fig. S12</b> (a) $^1H$ NMR and (b) IR spectra showcasing the effect of metal ions on <b>[2]</b> .                                                                                                                                             | <b>S16</b>     |
| <b>Fig. S13</b> (a) $^1H$ NMR and (b) IR spectra showcasing the effect of metal ions on <b>[3]</b> .                                                                                                                                             | <b>S17</b>     |
| <b>Fig. S14</b> EDAX (a) spectra showing elemental composition and (b) mapping depicting elemental presence for <b>[1]</b> .                                                                                                                     | <b>S18-S19</b> |
| <b>Fig. S15</b> EDAX (a) spectra showing elemental composition and (b) mapping depicting elemental presence for <b>[2]</b> .                                                                                                                     | <b>S20-S21</b> |
| <b>Fig. S16</b> EDAX (a) spectra showing elemental composition and (b) mapping depicting elemental presence for <b>[3]</b> .                                                                                                                     | <b>S22-S23</b> |
| <b>Fig. S17</b> Variation in emission intensity of <b>[1]</b> against $Cu^{2+}$ ions with (a) pond water sample and (b) tap water sample.                                                                                                        | <b>S24</b>     |

**Table S1** Comparative table for fluorescent probes with respect to synthesis condition, sensing ions, detection method, LOD, solvent medium.

| Fluorescent Probe                                                                                                                                                                    | Synthesis Condition                                                                   | Sensing Ions & Detection Method                                                                                                                                                                                         | LOD (M)                                                                                             | Solvent Medium                                                 | References |
|--------------------------------------------------------------------------------------------------------------------------------------------------------------------------------------|---------------------------------------------------------------------------------------|-------------------------------------------------------------------------------------------------------------------------------------------------------------------------------------------------------------------------|-----------------------------------------------------------------------------------------------------|----------------------------------------------------------------|------------|
| <p>[Co3(L)2(H2O)6]n (1)<br/>L= 1,3,5-(tris(1-(4- carboxyphenyl)-1h-pyrazol-3-yl) benzene (H3L)</p> 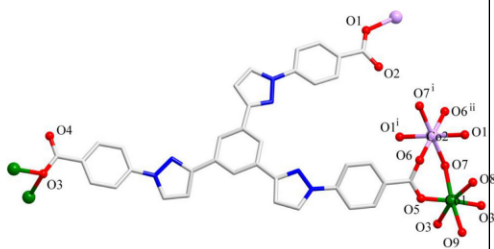  | <p>In autoclave<br/>Temperature :140 °C,<br/>Time : 72 h,<br/>Multistep synthesis</p> | <p>Cu<sup>2+</sup><br/>Fluorescence (Quenching)</p> <p>Hg<sup>2+</sup><br/>Fluorescence (Quenching)</p>                                                                                                                 | <p>Cu<sup>2+</sup><br/>9.91 × 10<sup>-7</sup></p> <p>Hg<sup>2+</sup><br/>1.26 × 10<sup>-5</sup></p> | <p>N,N-dimethylacetamide (DMA)</p>                             | <p>[1]</p> |
| <p>2-(4-Bromophenyl)ethene-1,1,2-triyltribenzene (2) and 4-(1,2,2-triphenylvinyl)benzaldehyde</p>  | <p>Temperature : -78 °C,<br/>Time : 48 h,<br/>Multistep synthesis</p>                 | <p>Cu<sup>2+</sup><br/>Fluorescence (Quenching)</p> <p>Hg<sup>2+</sup><br/>Fluorescence (Quenching)</p>                                                                                                                 | <p>Cu<sup>2+</sup><br/>2.42 × 10<sup>-6</sup></p> <p>Hg<sup>2+</sup><br/>0.39 × 10<sup>-6</sup></p> | <p>EtOH/H2O (v/v:1/1)</p>                                      | <p>[2]</p> |
| <p>Quinoxaline-hydrazinobenzothiazole</p>                                                         | <p>Temperature : 70 °C,<br/>Time : 12 h,<br/>Multistep synthesis</p>                  | <p>Cu<sup>2+</sup><br/>Fluorescence (Enhancement)</p> <p>Co<sup>2+</sup><br/>Fluorescence (Enhancement)</p> <p>Ni<sup>2+</sup><br/>Fluorescence (Enhancement)</p> <p>Hg<sup>2+</sup><br/>Fluorescence (Enhancement)</p> | <p>Cu<sup>2+</sup><br/>1.16 × 10<sup>-7</sup></p> <p>Hg<sup>2+</sup><br/>1.14 × 10<sup>-7</sup></p> | <p>THF : H2O (1 : 9, v/v)<br/>(pH 7.4, 20 mM HEPES buffer)</p> | <p>[3]</p> |
|                                                                                                                                                                                      |                                                                                       |                                                                                                                                                                                                                         |                                                                                                     |                                                                |            |

|                                                                                                                                         |                                                                    |                                                                                                                                            |                                                                                                   |                                          |     |
|-----------------------------------------------------------------------------------------------------------------------------------------|--------------------------------------------------------------------|--------------------------------------------------------------------------------------------------------------------------------------------|---------------------------------------------------------------------------------------------------|------------------------------------------|-----|
| 4-amino antipyrine linked bis-1,2,3-triazole<br>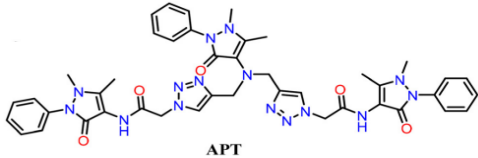<br>APT | Temperature : RT,<br>Time : 18 h,<br>Multistep synthesis           | Cu <sup>2+</sup><br>Absorbance<br>(Enhancement)<br><br>Hg <sup>2+</sup><br>Absorbance<br>(Enhancement)                                     | Cu <sup>2+</sup><br>63 × 10 <sup>-6</sup><br><br>Hg <sup>2+</sup><br>56 × 10 <sup>-6</sup>        | DMSO                                     | [4] |
| Tetraphenylethylene (TPE) based COF nanosheets<br>    | Temperature : 120 °C,<br>Time : 5 days,<br>Multistep synthesis     | Cu <sup>2+</sup><br>Fluorescence<br>(Quenching)                                                                                            | 0.28 × 10 <sup>-9</sup>                                                                           | Neutral F127 surfactant in aqueous media | [5] |
| <b>This Work</b>                                                                                                                        | Temperature : 75 °C,<br>Time: 3 h,<br>Simple single step synthesis | Cu <sup>2+</sup><br>Fluorescence<br>(Quenching)<br>Hg <sup>2+</sup><br>Fluorescence<br>(Quenching in case of [2,3] and enhancement in [1]) | Cu <sup>2+</sup><br>0.751 × 10 <sup>-6</sup><br><br>Hg <sup>2+</sup><br>3.1937 × 10 <sup>-6</sup> | MeCN: H <sub>2</sub> O (1:9)             |     |

## References

1. Y. Xi, M. Hua , L. Gao, Q. Sun , E. Ma , W. Hu , M. Li , W. Liu , J. Sun and C. Zhang, *J. Mol. Struct.*, 2023, **1284**, 135456.
2. S. Bayindir , A. S. Hussein, F. Lafzi and M. Toprak, *J. Mol. Liq.*, 2023, **382**, 121939.
3. D. B. C. Leslee, U. Venkatachalam, J. Gunasekaran, S. Karuppannan and S. Bharathi Kuppannan, *Org. Biomol. Chem.*, 2023, **21**, 4130–4143.
4. S. Kumar, B. Lal, R. K. Tittal, G. Singh, J. Singh, G. Vikas D, R. Sharma and J. K. Sabane *Sens. Diagn.*, 2023, **2**, 1267–1276.
5. Zi. Yan, L. Fang, Z. He, H. Xie, B. Liu , B. Guo and Y. Yao, *Small*, 2022, **18**, 2200388.

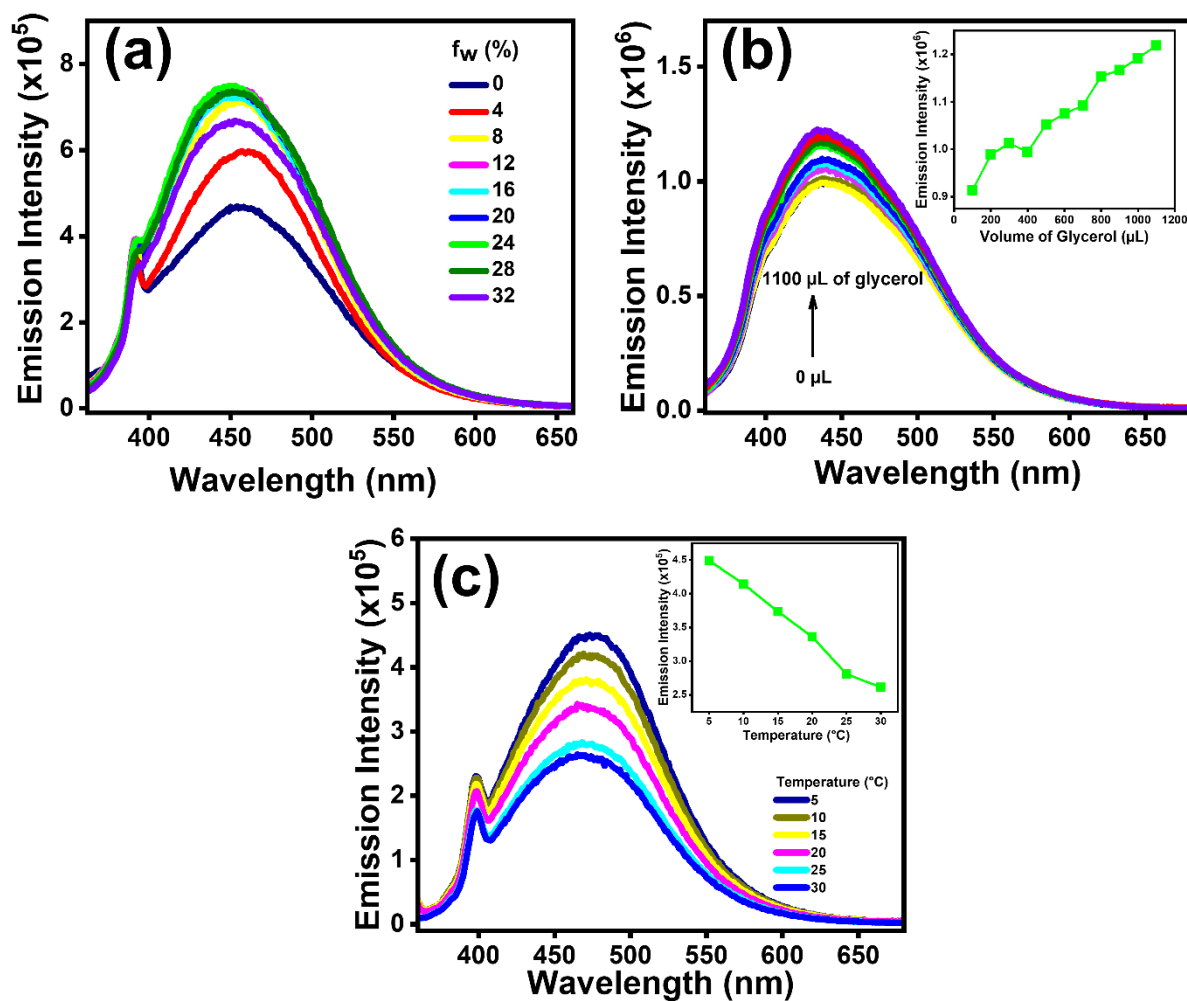

**Fig. S1** (a) Increase of emission intensity with the increase in water fraction, (b) enhanced emission intensity with higher viscosity, (c) decrease in emission intensity with higher temperature for [1].

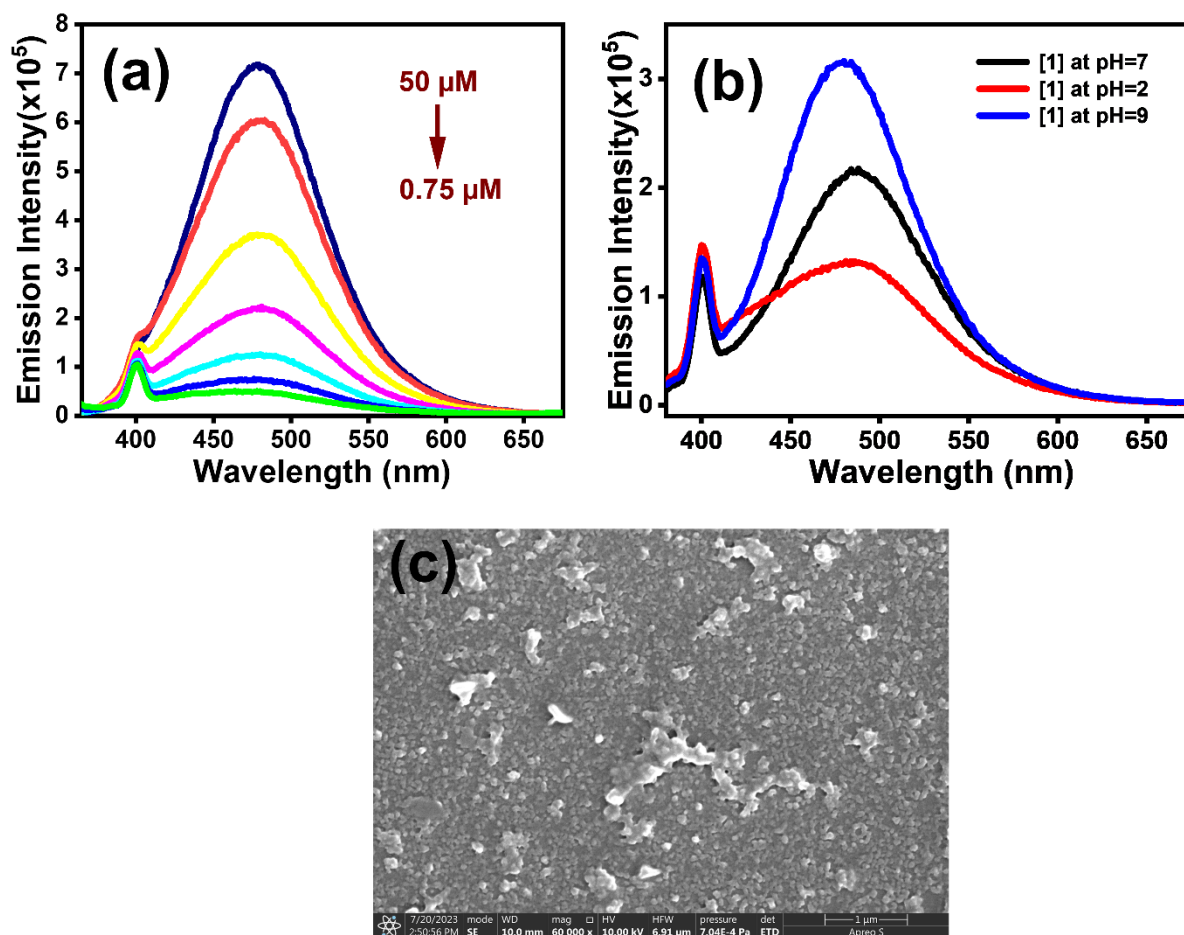

**Fig. S2** (a) Lowering of emission intensity with the decrease in concentration, (b) enhanced emission intensity with higher pH, (c) formation of aggregates observed in SEM image for **[1]**.

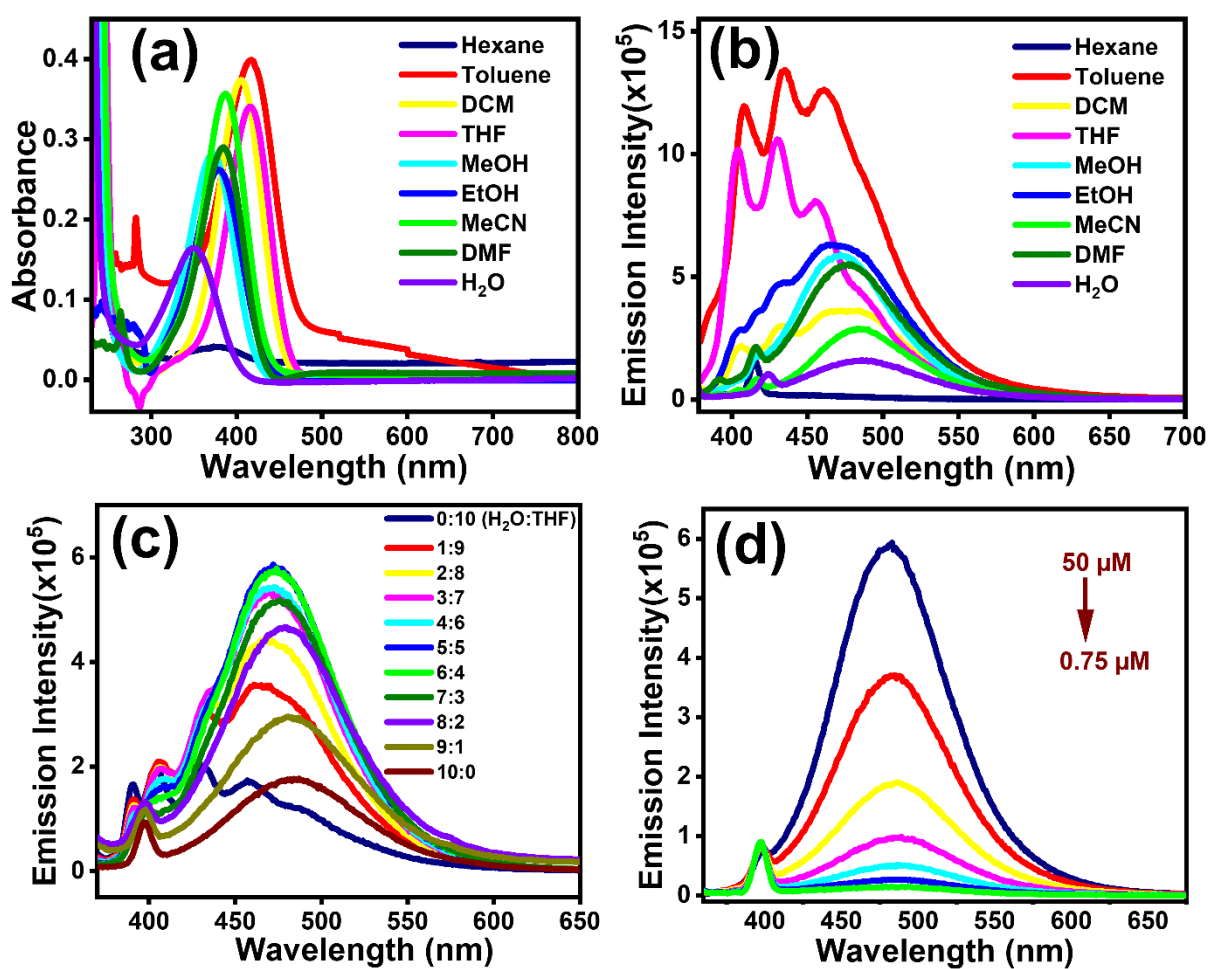

**Fig. S3 [2]** (a) Shift in absorption spectra and (b) emission spectra ( $\lambda_{\text{exc}} \sim 370$  nm) with increase in polarity depicting solvatochromism, (c) quenching of emission intensity due to aggregation in varying proportions of H<sub>2</sub>O:THF solvent mixture, (d) lowering of emission intensity with the decrease in concentration.

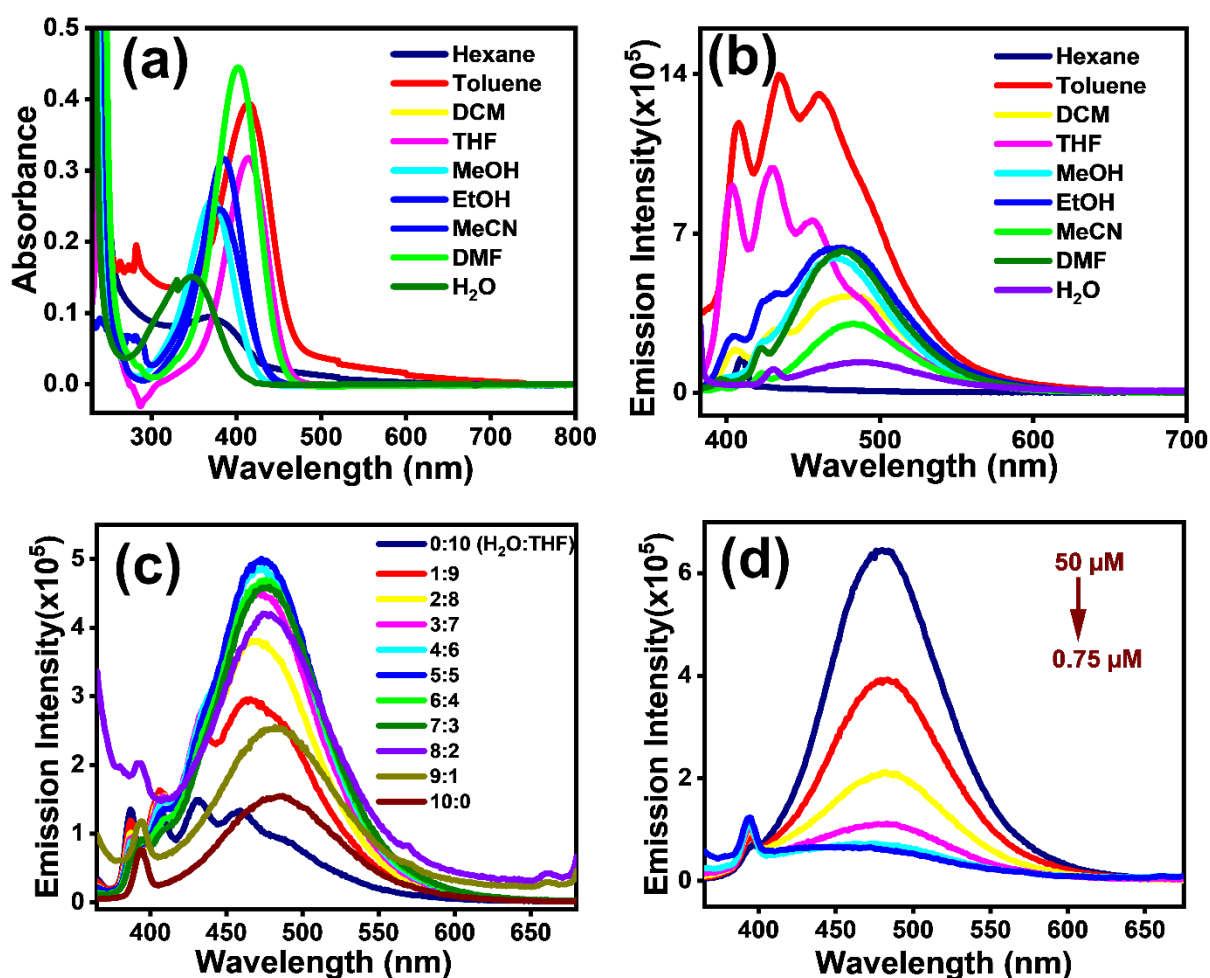

**Fig. S4 [3]** (a) Shift in absorption spectra and (b) emission spectra ( $\lambda_{\text{exc}} \sim 375$  nm) with increase in polarity depicting solvatochromism, (c) quenching of emission intensity due to aggregation in varying proportions of H<sub>2</sub>O:THF solvent mixture, (d) lowering of emission intensity with the decrease in concentration.

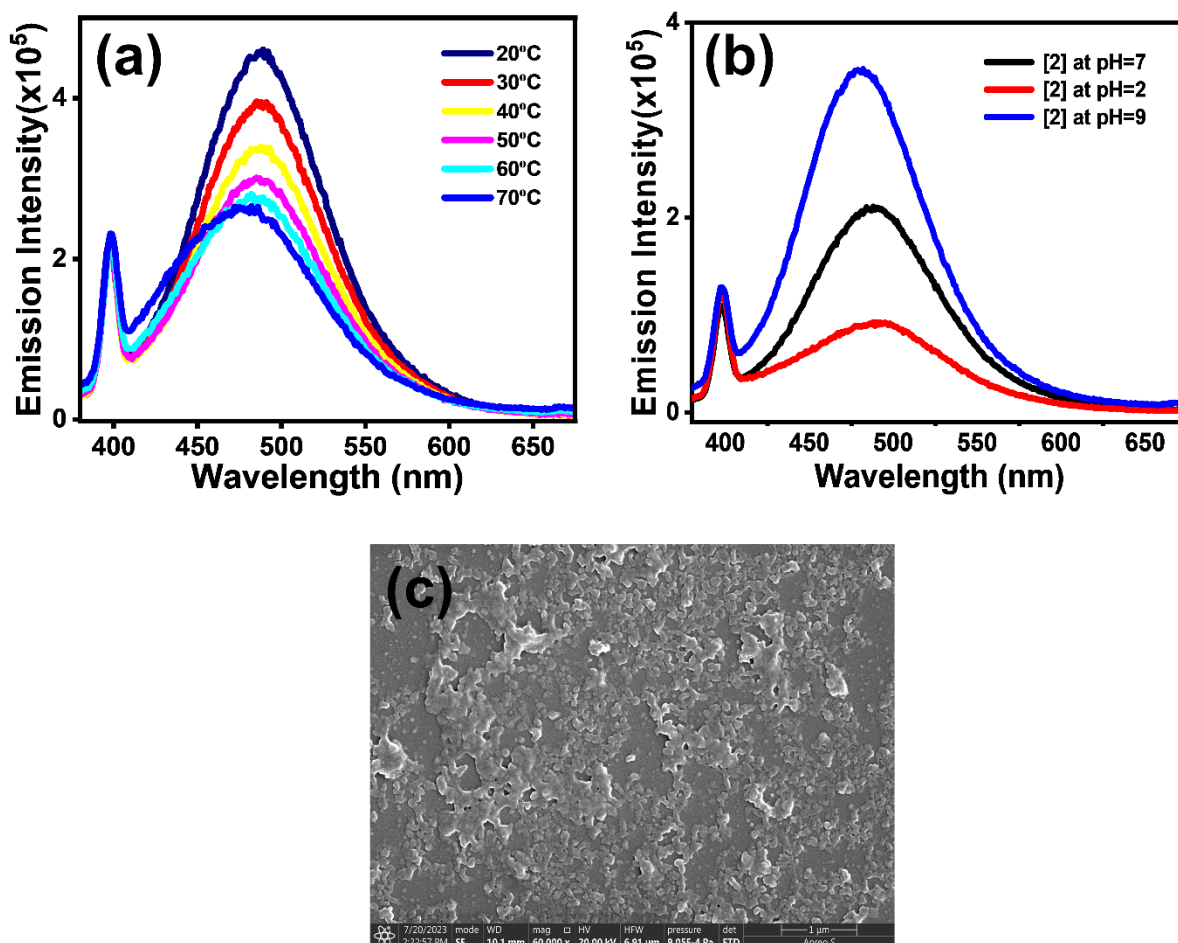

**Fig. S5** (a) Lowering of emission intensity with the increase in temperature, (b) enhanced emission intensity with higher pH, (c) formation of aggregates observed in SEM image for [2].



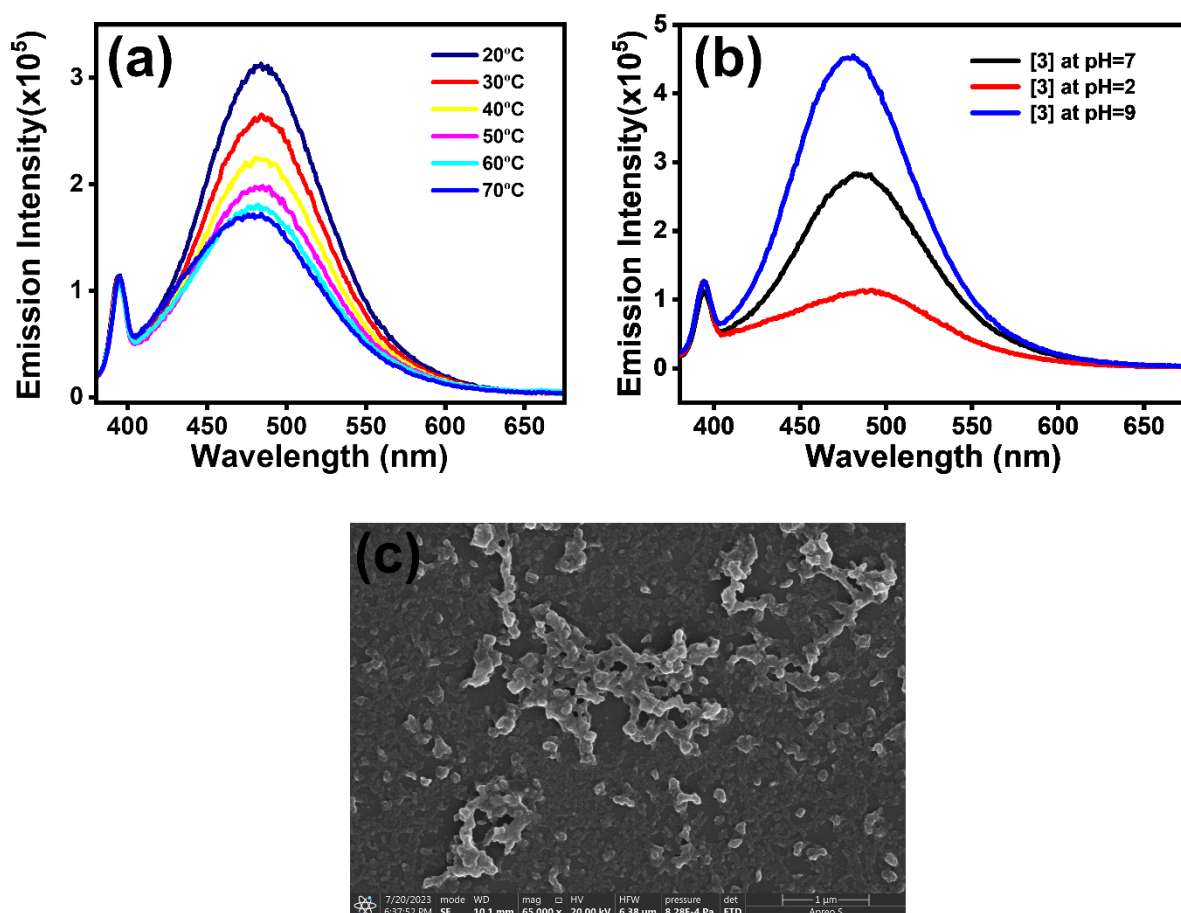

**Fig. S6** (a) Lowering of emission intensity with the increase in temperature, (b) enhanced emission intensity with higher pH, (c) formation of aggregates observed in SEM image for [3].

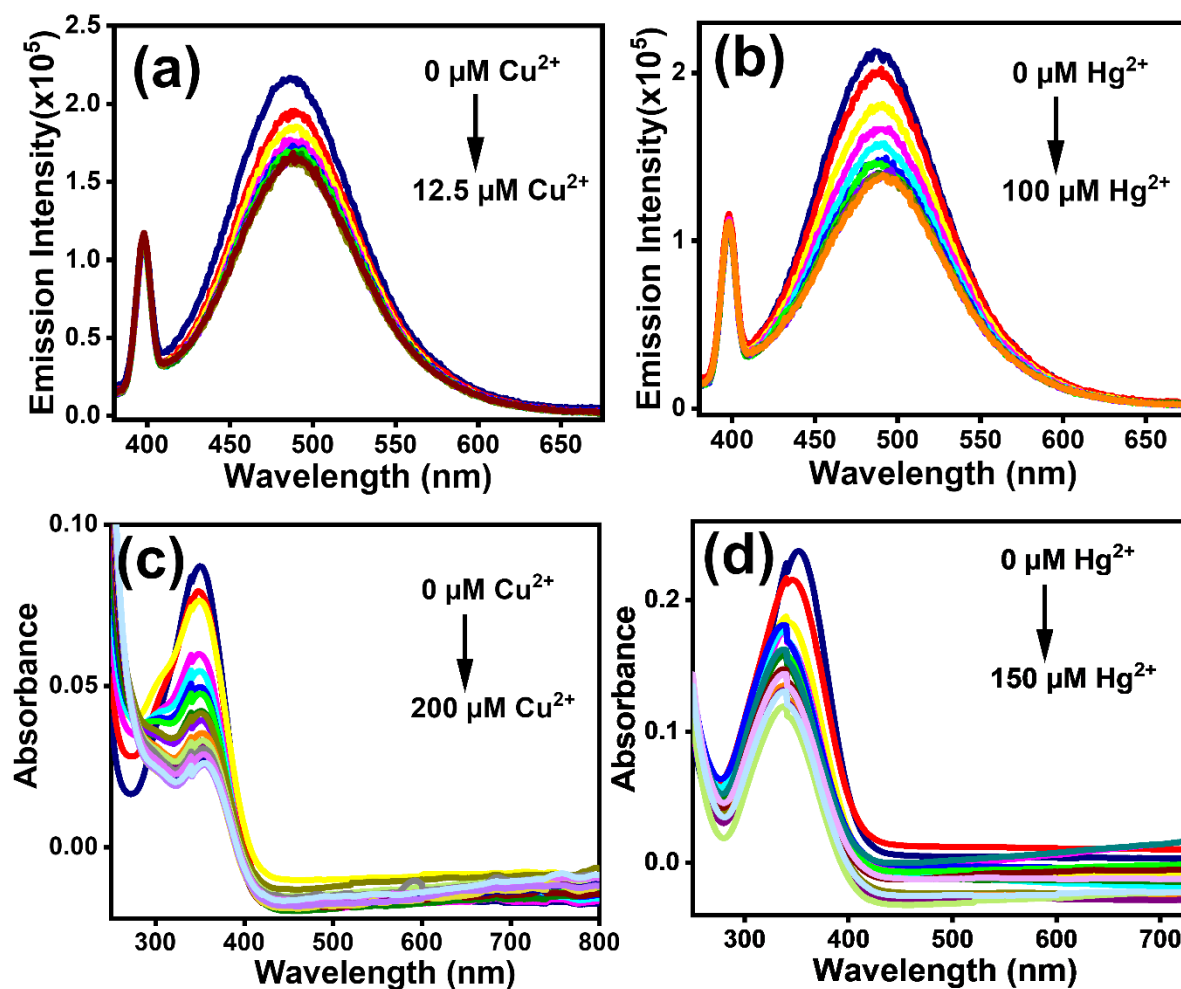

**Fig. S7** Variation in emission intensity of **[2]** with increase in metal ion concentration: quenching effect for (a)  $\text{Cu}^{2+}$  and (b)  $\text{Hg}^{2+}$ . Lowering of absorbance with an increase in concentration of (c)  $\text{Cu}^{2+}$  and (d)  $\text{Hg}^{2+}$  for **[2]**.

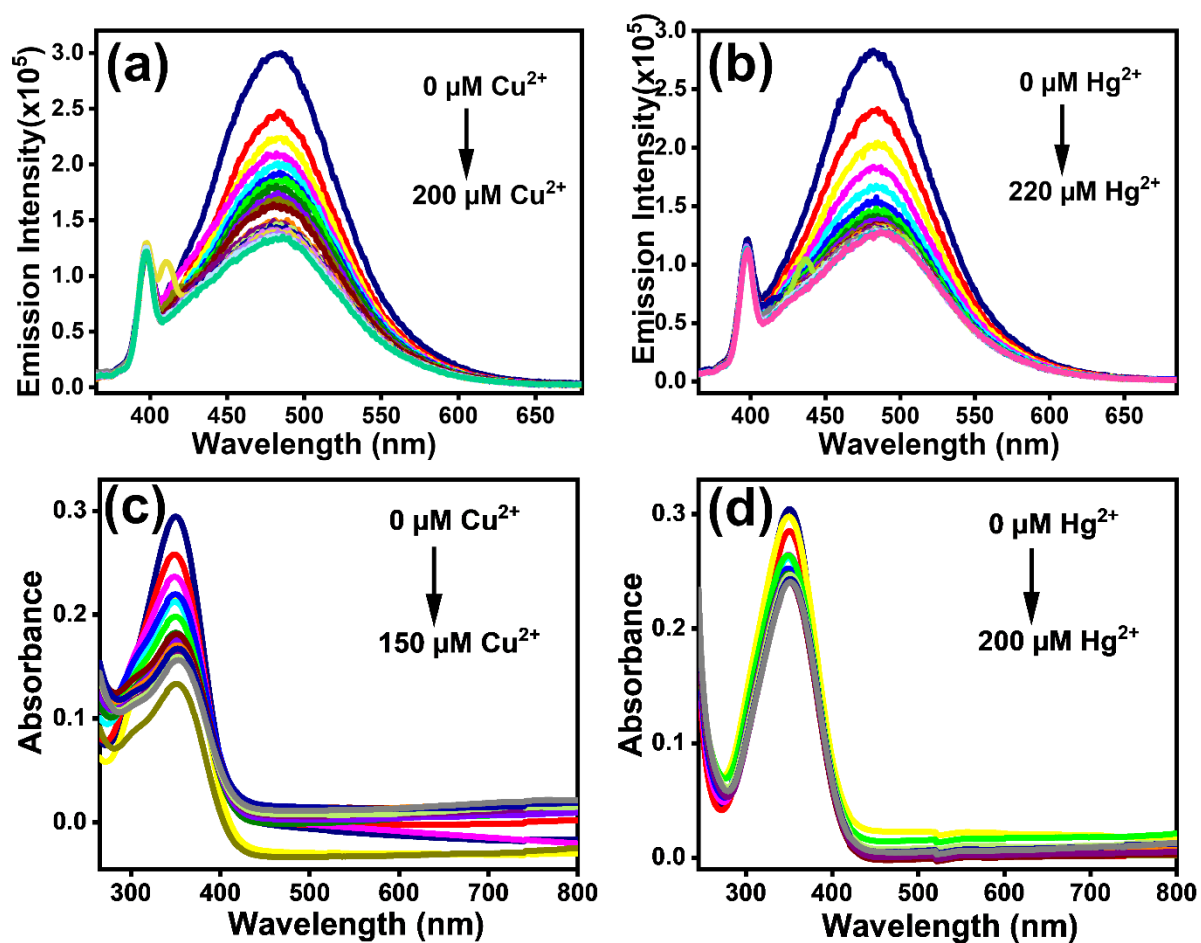

**Fig. S8** Variation in emission intensity of **[3]** with increase in metal ion concentration: quenching effect for (a)  $\text{Cu}^{2+}$  and (b)  $\text{Hg}^{2+}$ . Lowering of absorbance with an increase in concentration of (c)  $\text{Cu}^{2+}$  and (d)  $\text{Hg}^{2+}$  for **[3]**.

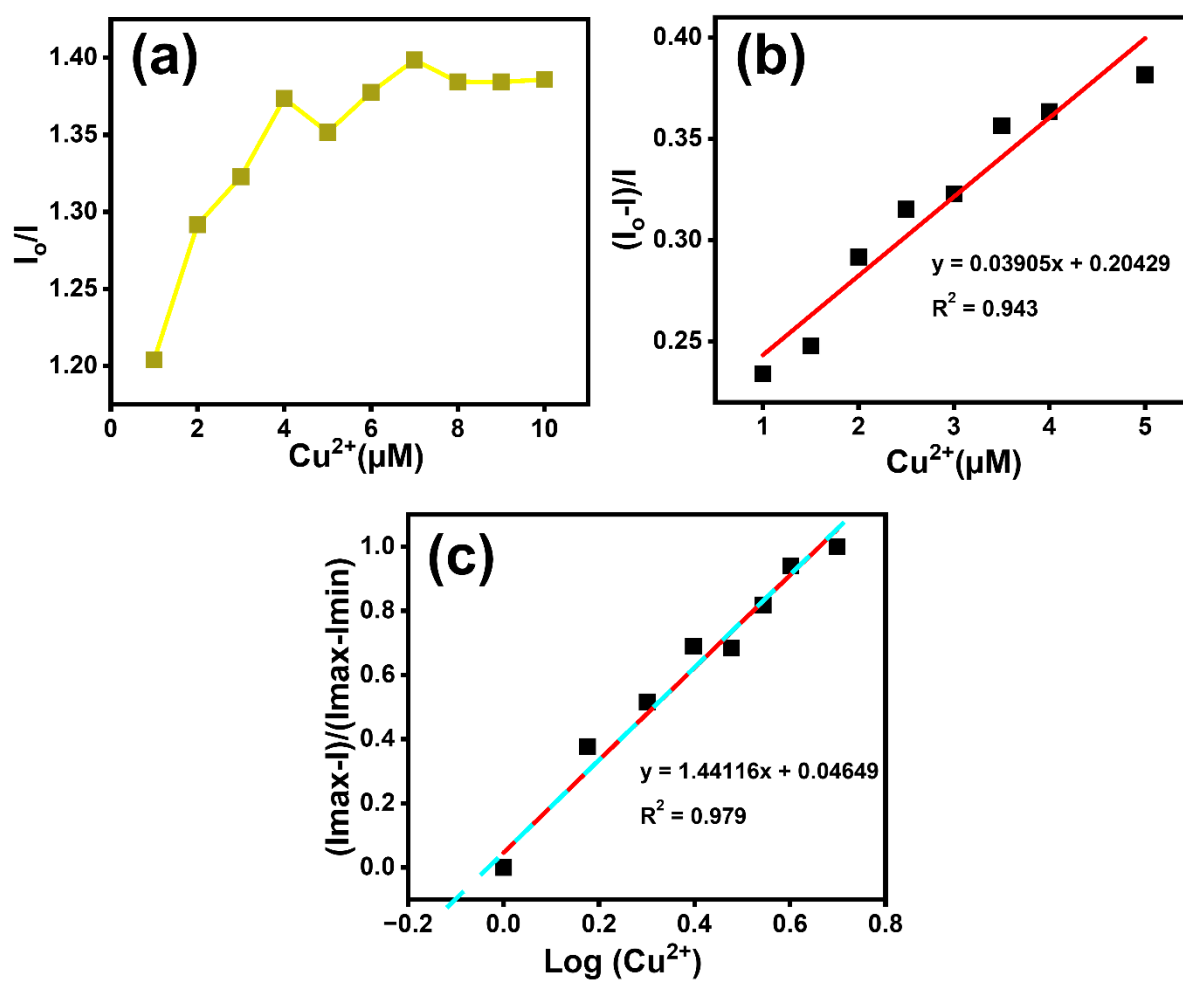

**Fig. S9** (a) Stern-Volmer plot, (b)  $K_{sv}$  calculation, (c) LOD calculation, depicting quenching of [1] on addition of  $\text{Cu}^{2+}$  ion.

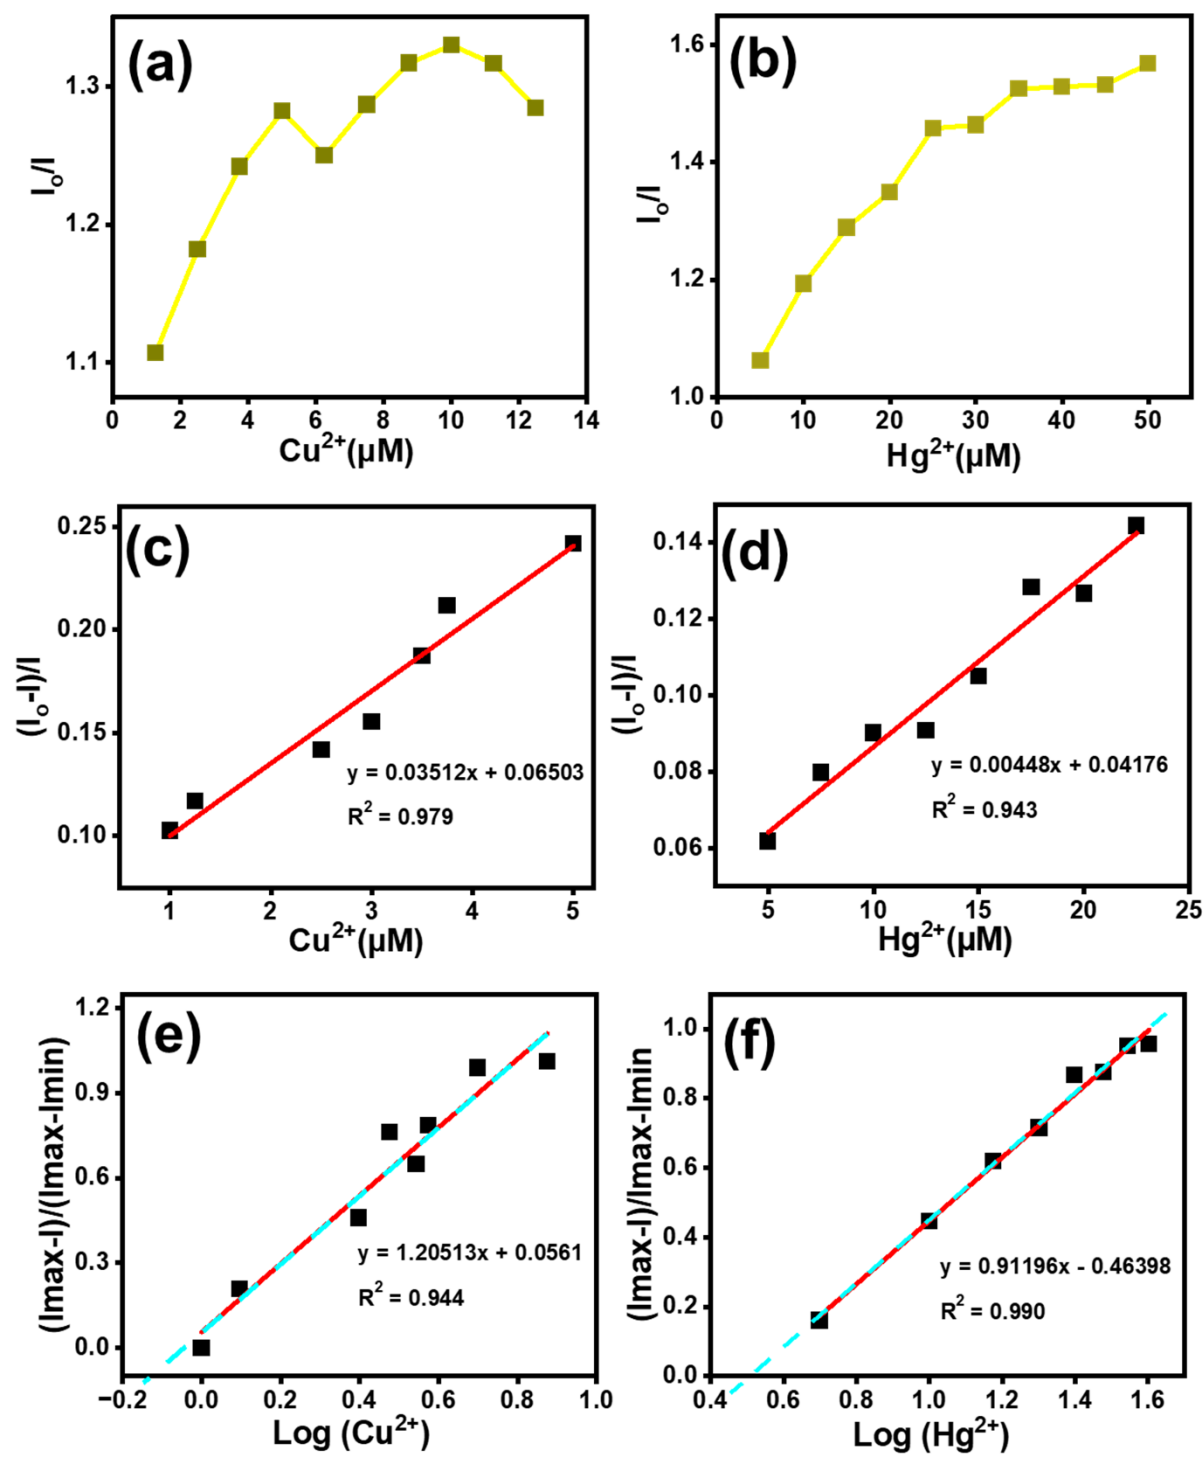

**Fig. S10** Stern-Volmer plots for (a)  $\text{Cu}^{2+}$  and (b)  $\text{Hg}^{2+}$ ,  $K_{\text{SV}}$  calculation (c)  $\text{Cu}^{2+}$  and (d)  $\text{Hg}^{2+}$ , LOD calculation (e)  $\text{Cu}^{2+}$  and (f)  $\text{Hg}^{2+}$ , depicting quenching of [2] on addition of metal ion.

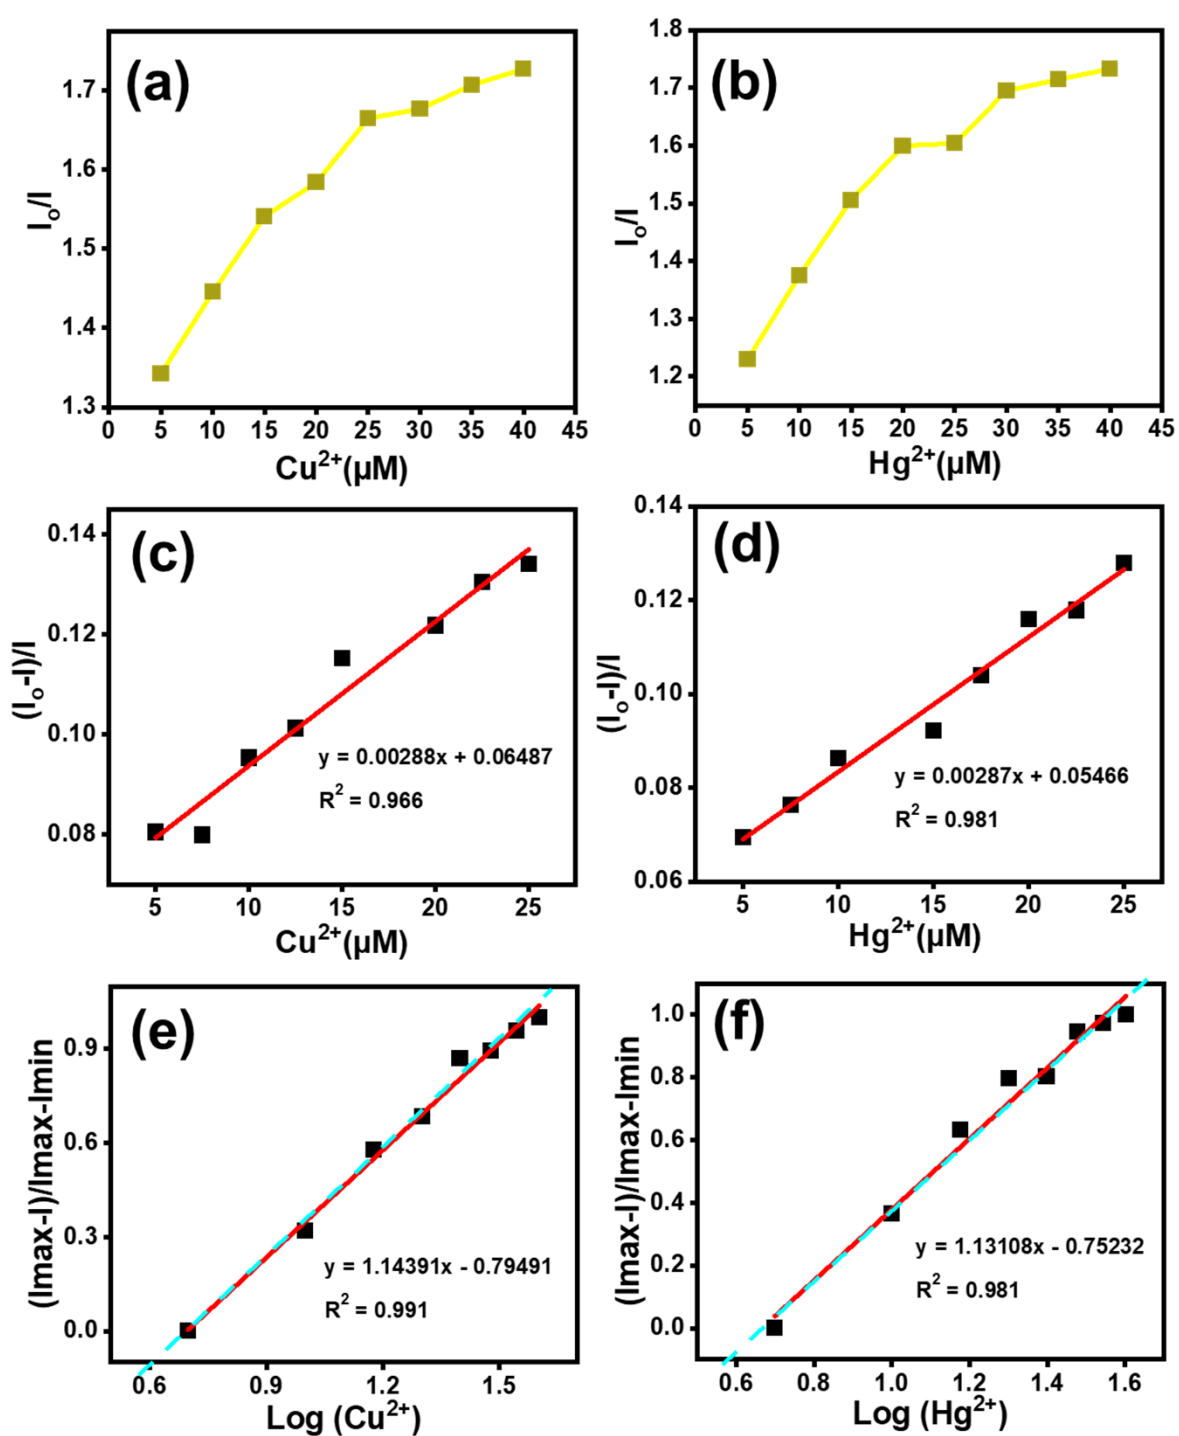

**Fig. S11** Stern-Volmer plots for (a)  $\text{Cu}^{2+}$  and (b)  $\text{Hg}^{2+}$ ,  $K_{sv}$  calculation (c)  $\text{Cu}^{2+}$  and (d)  $\text{Hg}^{2+}$ , LOD calculation (e)  $\text{Cu}^{2+}$  and (f)  $\text{Hg}^{2+}$  depicting quenching of **[3]** on addition of metal ion.

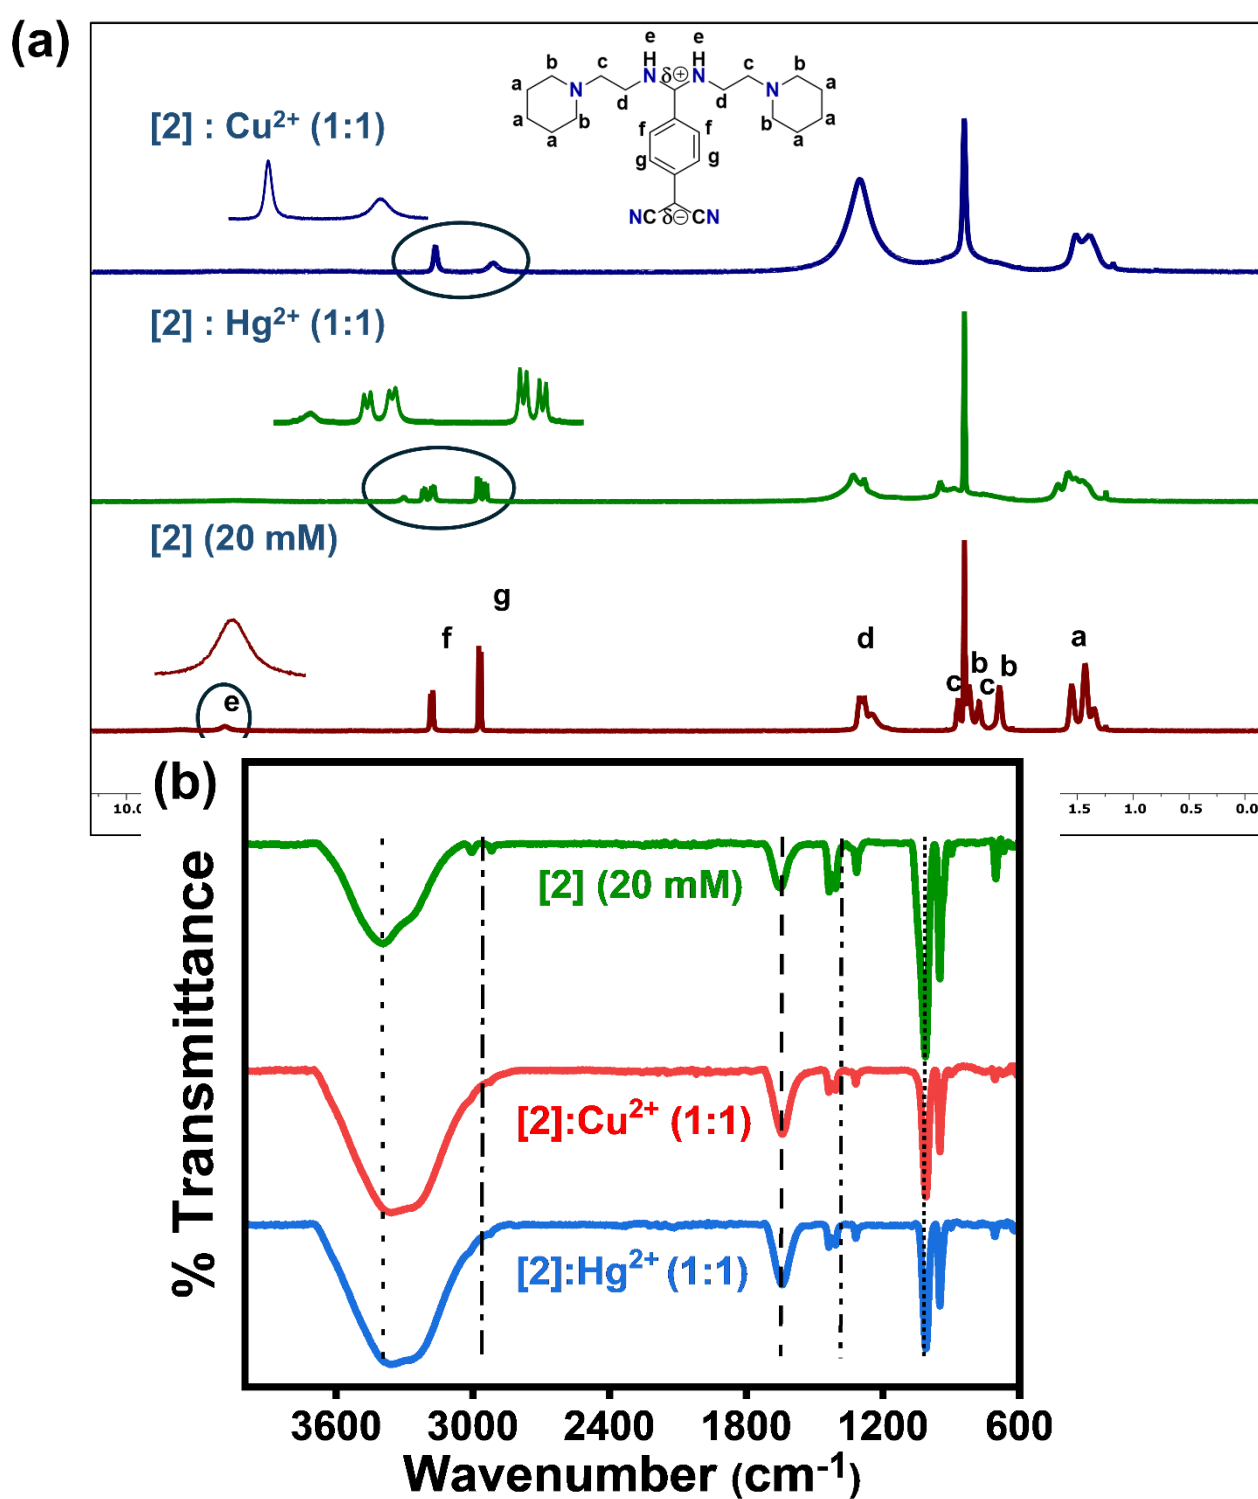

**Fig. S12** (a)  $^1\text{H}$  NMR to understand the mechanistic insights on addition of metal ions on [2]. (b) FT-IR spectra to understand the mechanistic insights on the addition of metal ions with [2].

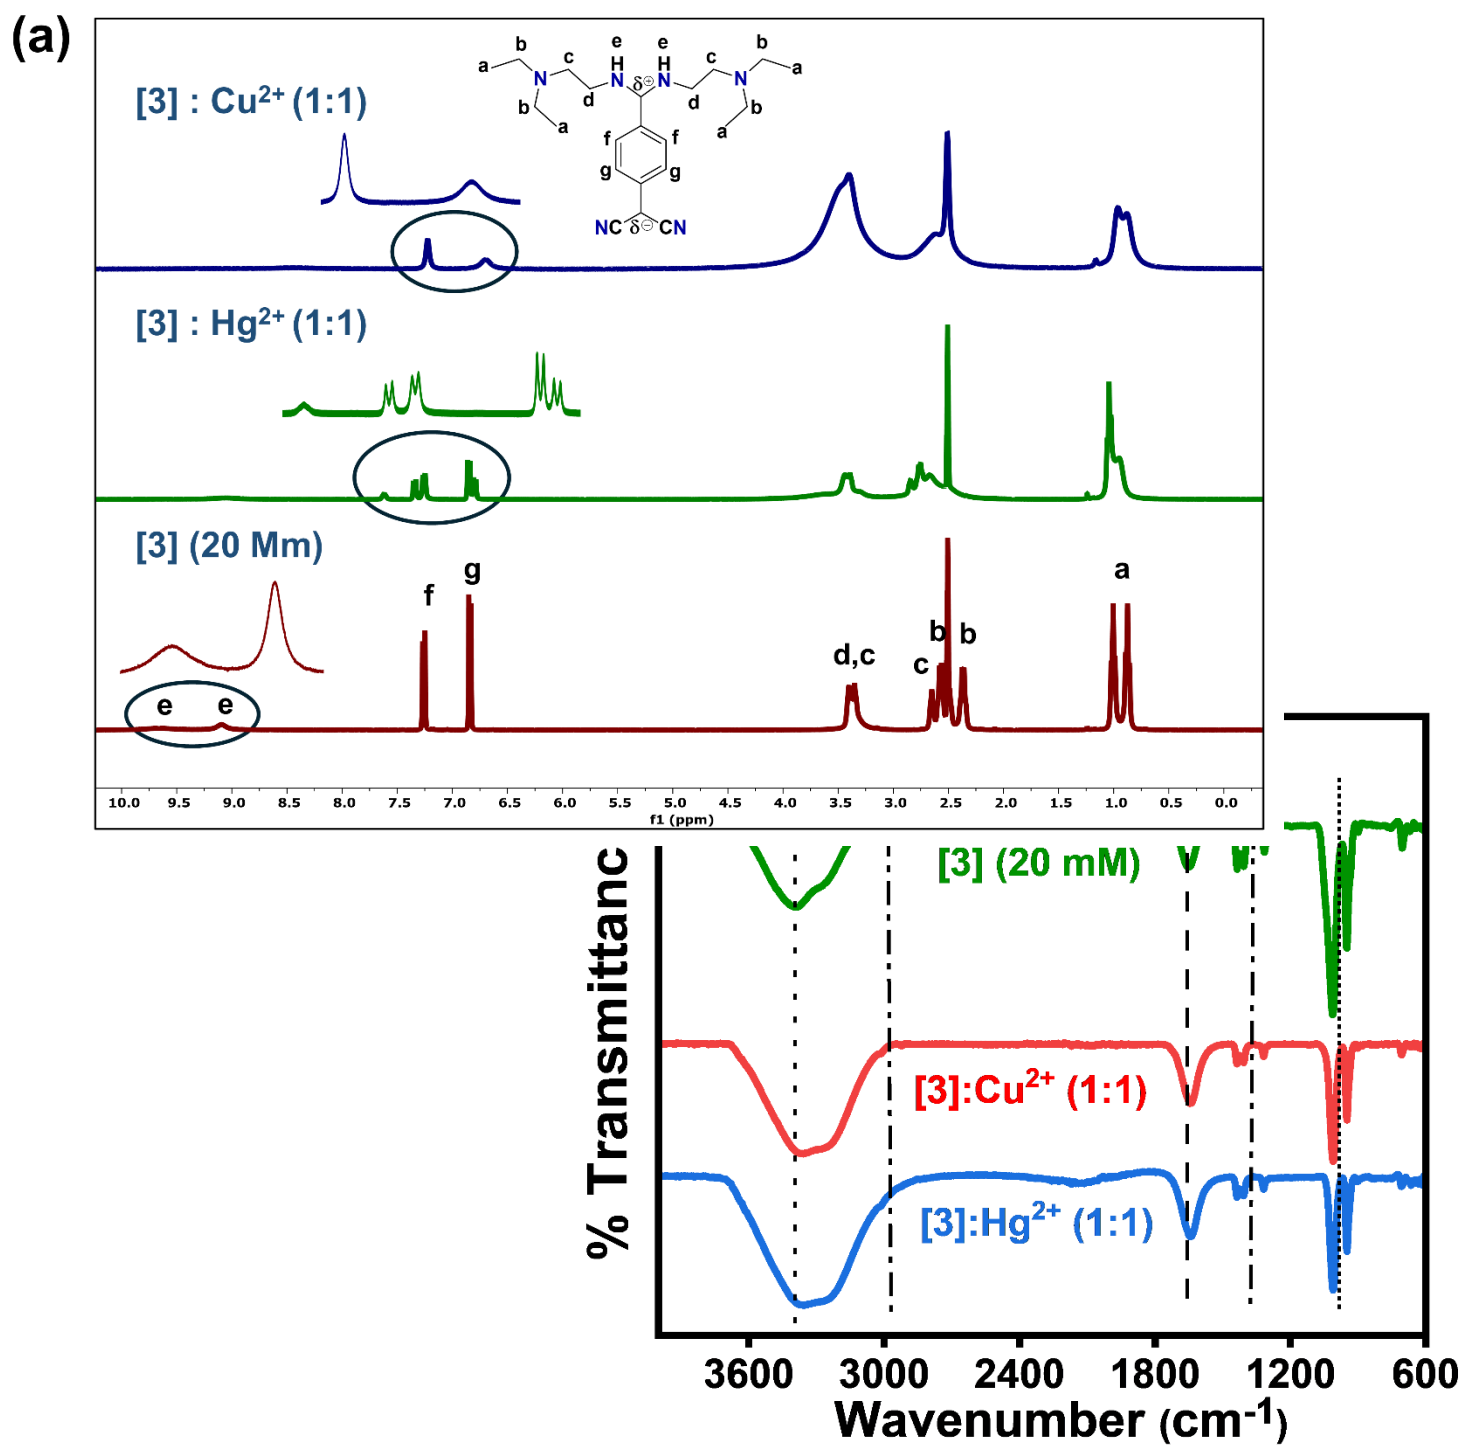

**Fig. S13**  $^1\text{H}$  NMR to understand the mechanistic insights on addition of metal ions on **[3]**. **(b)** FT-IR spectra showcasing binding of metal ion with **[3]**.

**(a)**

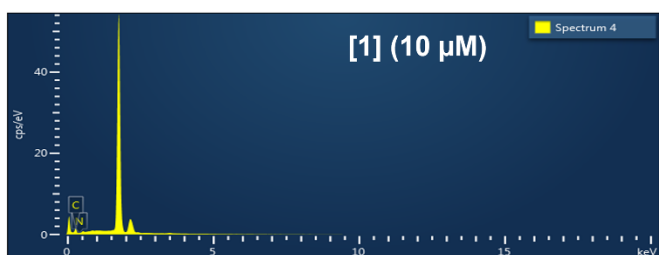

| Element  | Wt%          | Atomic%      |
|----------|--------------|--------------|
| <b>C</b> | <b>71.62</b> | <b>74.63</b> |
| <b>N</b> | <b>28.38</b> | <b>25.37</b> |
| Total    | 100          | 100          |

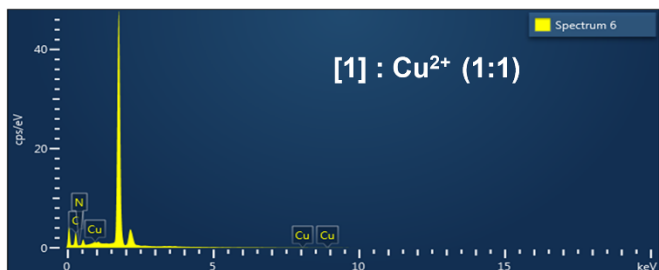

| Element   | Wt%          | Atomic%      |
|-----------|--------------|--------------|
| <b>C</b>  | <b>74.96</b> | <b>79.50</b> |
| <b>N</b>  | <b>21.84</b> | <b>19.86</b> |
| <b>Cu</b> | <b>3.20</b>  | <b>0.64</b>  |
| Total     | 100          | 100          |

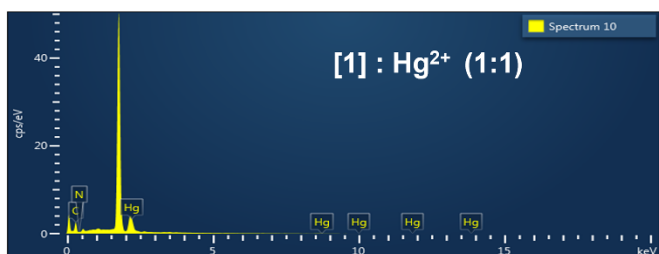

| Element   | Wt%          | Atomic%      |
|-----------|--------------|--------------|
| <b>C</b>  | <b>64.43</b> | <b>88.28</b> |
| <b>N</b>  | <b>8.06</b>  | <b>9.47</b>  |
| <b>Hg</b> | <b>27.51</b> | <b>2.26</b>  |
| Total     | 100          | 100          |

16



(b)

[1] :  $\text{Cu}^{2+}$  (1:1)

C  $\text{K}\alpha_{1,2}$

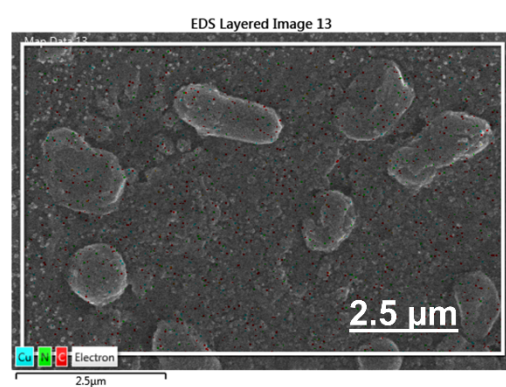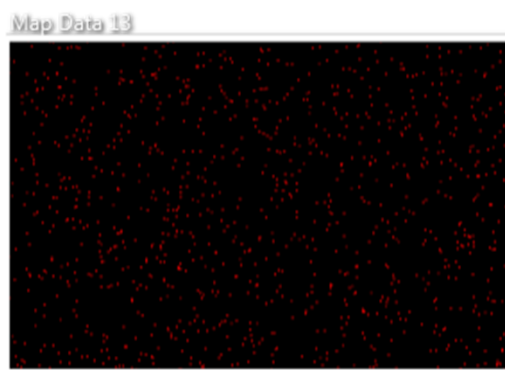

N  $\text{K}\alpha_{1,2}$

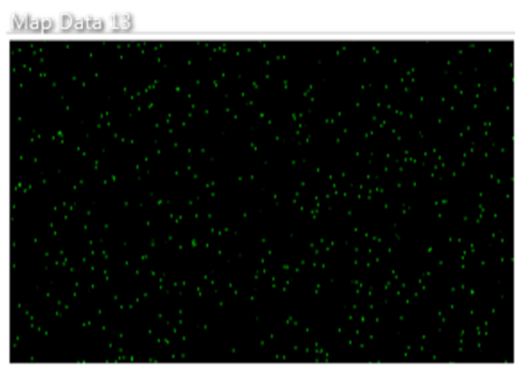

Cu  $\text{K}\alpha_1$

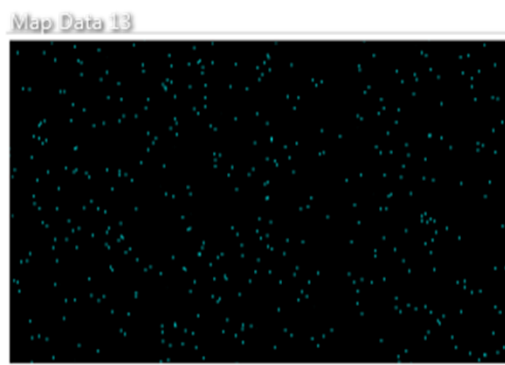

**[1] : Hg<sup>2+</sup> (1:1)**

**C Kα1\_2**

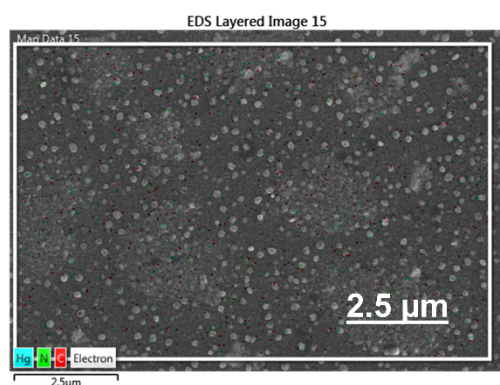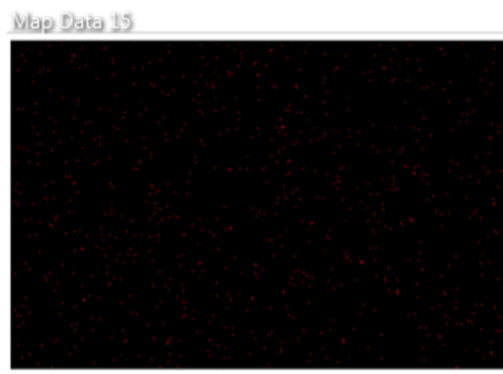

**N Kα1\_2**

**Hg Mα1**

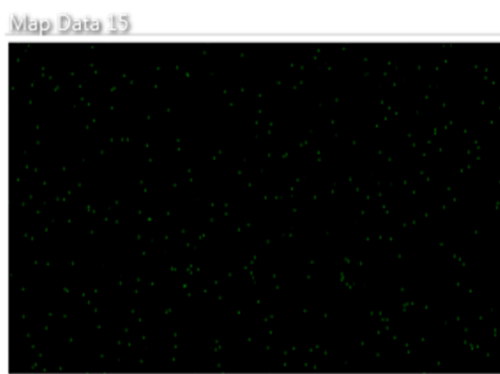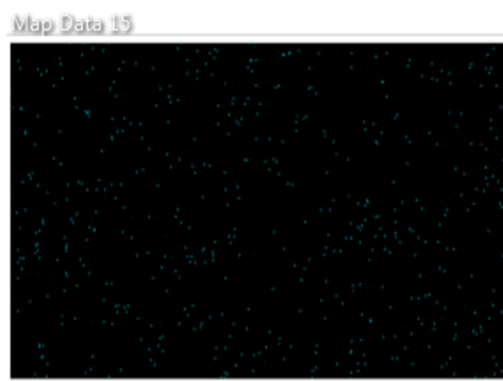

**Fig. S14** (a) EDAX spectra showing change in elemental composition for **[1]** with addition of metal ion. (b) EDAX mapping depicting elemental presence for **[1]** on metal ion addition.

**(a)**

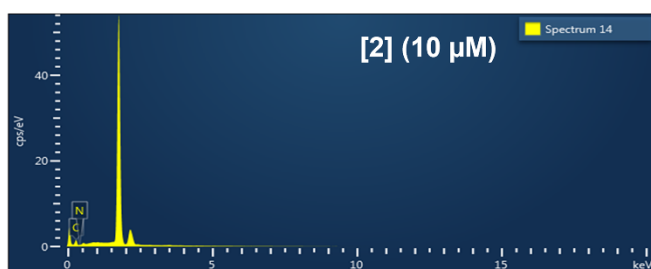

| Element  | Wt%          | Atomic%      |
|----------|--------------|--------------|
| <b>C</b> | <b>68.43</b> | <b>71.66</b> |
| <b>N</b> | <b>31.57</b> | <b>28.34</b> |
| Total    | 100          | 100          |

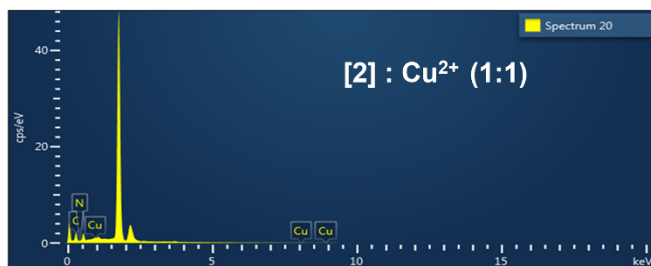

| Element   | Wt%          | Atomic%      |
|-----------|--------------|--------------|
| <b>C</b>  | <b>63.69</b> | <b>68.13</b> |
| <b>N</b>  | <b>34.31</b> | <b>31.47</b> |
| <b>Cu</b> | <b>2.00</b>  | <b>0.41</b>  |
| Total     | 100          | 100          |

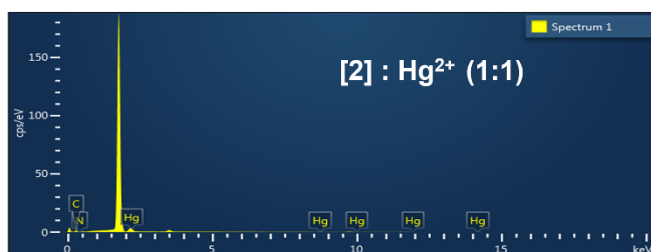

| Element   | Wt%          | Atomic%      |
|-----------|--------------|--------------|
| <b>C</b>  | <b>78.85</b> | <b>95.02</b> |
| <b>N</b>  | <b>3.60</b>  | <b>3.72</b>  |
| <b>Hg</b> | <b>17.56</b> | <b>1.27</b>  |
| Total     | 100          | 100          |

(b)

[2] :  $\text{Cu}^{2+}$  (1:1)

C K $\alpha$ 1\_2

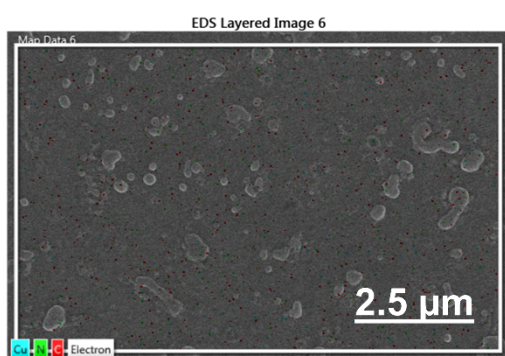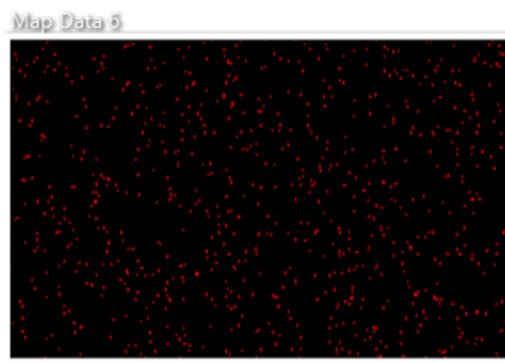

[2] :  $\text{Hg}^{2+}$  (1:1)

C K $\alpha$ 1\_2

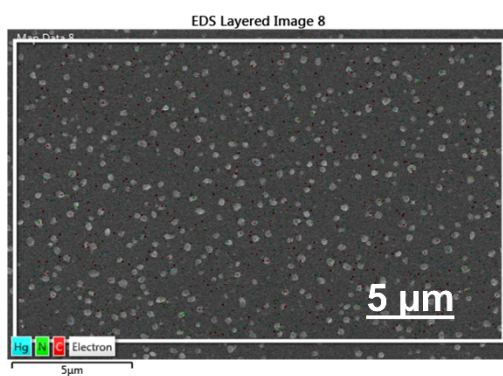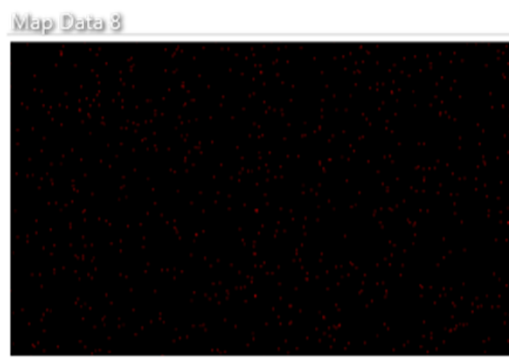

N K $\alpha$ 1\_2

Hg M $\alpha$ 1

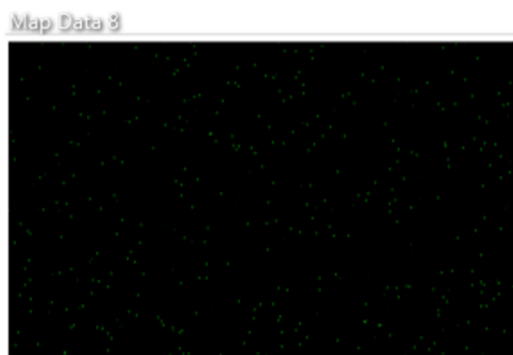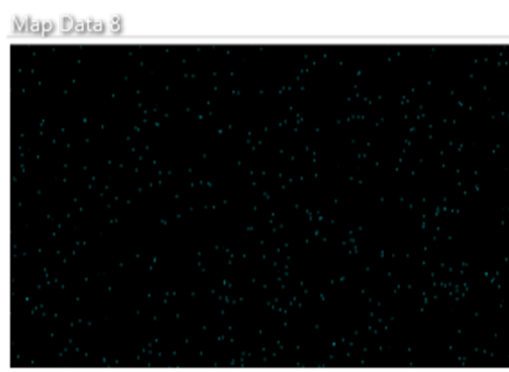

**Fig. S15** (a) EDAX spectra showing change in elemental composition for **[2]** with addition of metal ion. (b) EDAX mapping depicting elemental presence for **[2]** on metal ion addition.

**(a)**

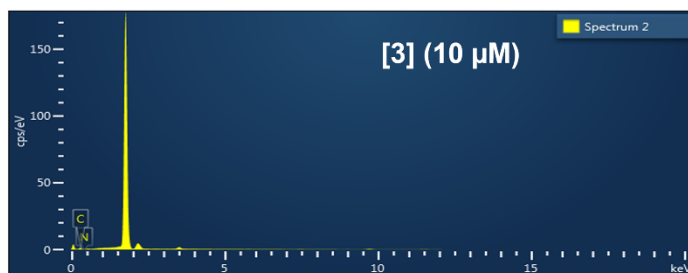

| Element  | Wt%          | Atomic%      |
|----------|--------------|--------------|
| <b>C</b> | <b>69.29</b> | <b>72.46</b> |
| <b>N</b> | <b>30.71</b> | <b>27.54</b> |
| Total    | 100          | 100          |

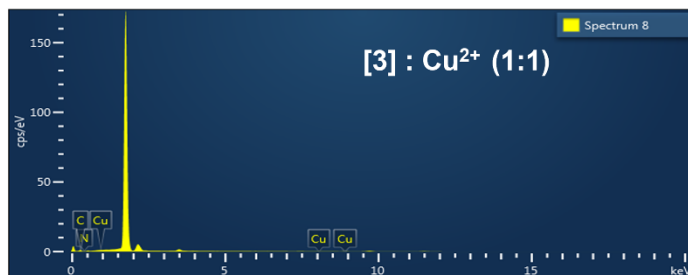

| Element   | Wt%          | Atomic%      |
|-----------|--------------|--------------|
| <b>C</b>  | <b>73.94</b> | <b>79.07</b> |
| <b>N</b>  | <b>21.92</b> | <b>20.09</b> |
| <b>Cu</b> | <b>4.14</b>  | <b>0.84</b>  |
| Total     | 100          | 100          |

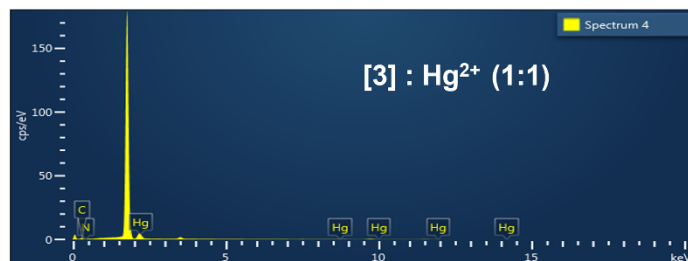

| Element   | Wt%          | Atomic%      |
|-----------|--------------|--------------|
| <b>C</b>  | <b>68.74</b> | <b>88.92</b> |
| <b>N</b>  | <b>8.40</b>  | <b>9.31</b>  |
| <b>Hg</b> | <b>22.87</b> | <b>1.77</b>  |
| Total     | 100          | 100          |

(b)

[3] :  $\text{Cu}^{2+}$  (1:1)

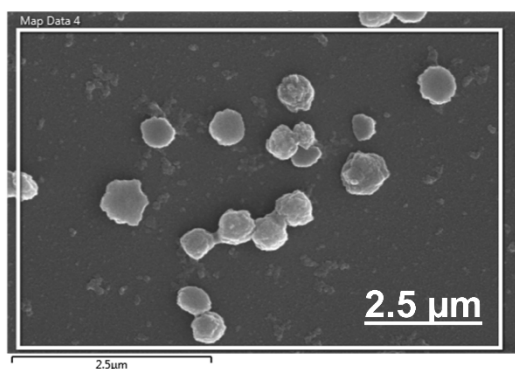

C K $\alpha$ 1\_2

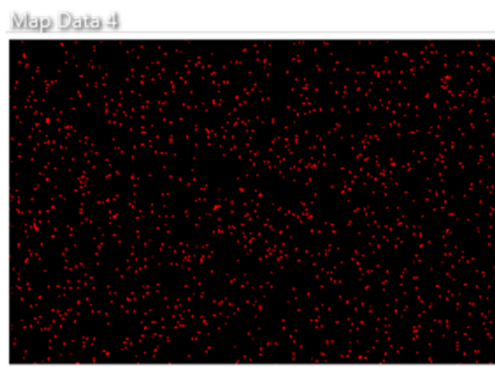

N K $\alpha$ 1\_2

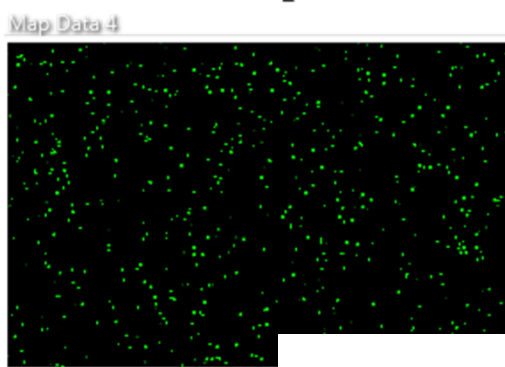

Cu K $\alpha$ 1

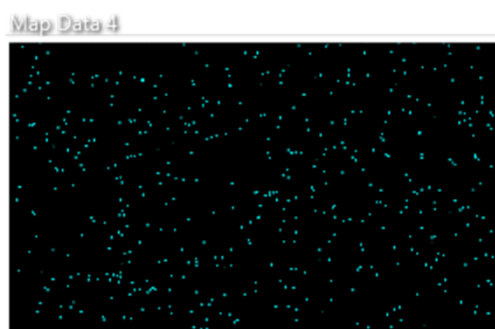

[3] :  $\text{Hg}^{2+}$  (1:1)

C K $\alpha$ 1\_2

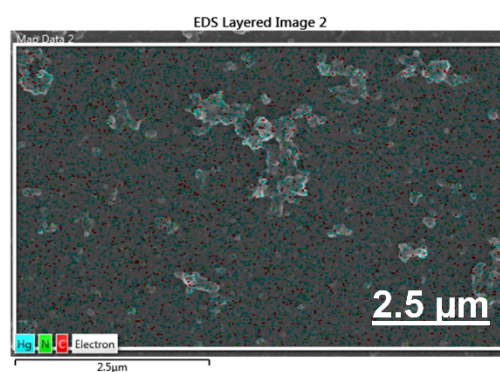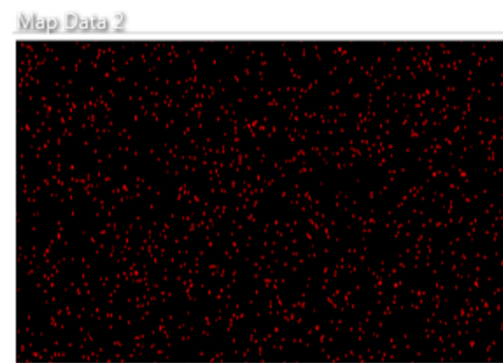

N K $\alpha$ 1\_2

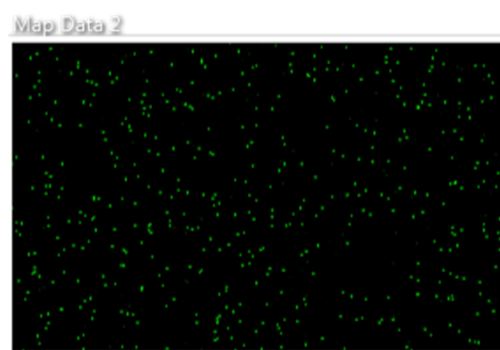

Hg M $\alpha$ 1

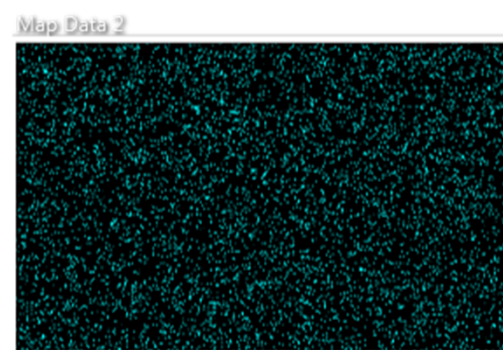

**Fig. S16** (a) EDAX spectra showing change in elemental composition for [3] with addition of metal ion. (b) EDAX mapping depicting elemental presence for [3] on metal ion addition.

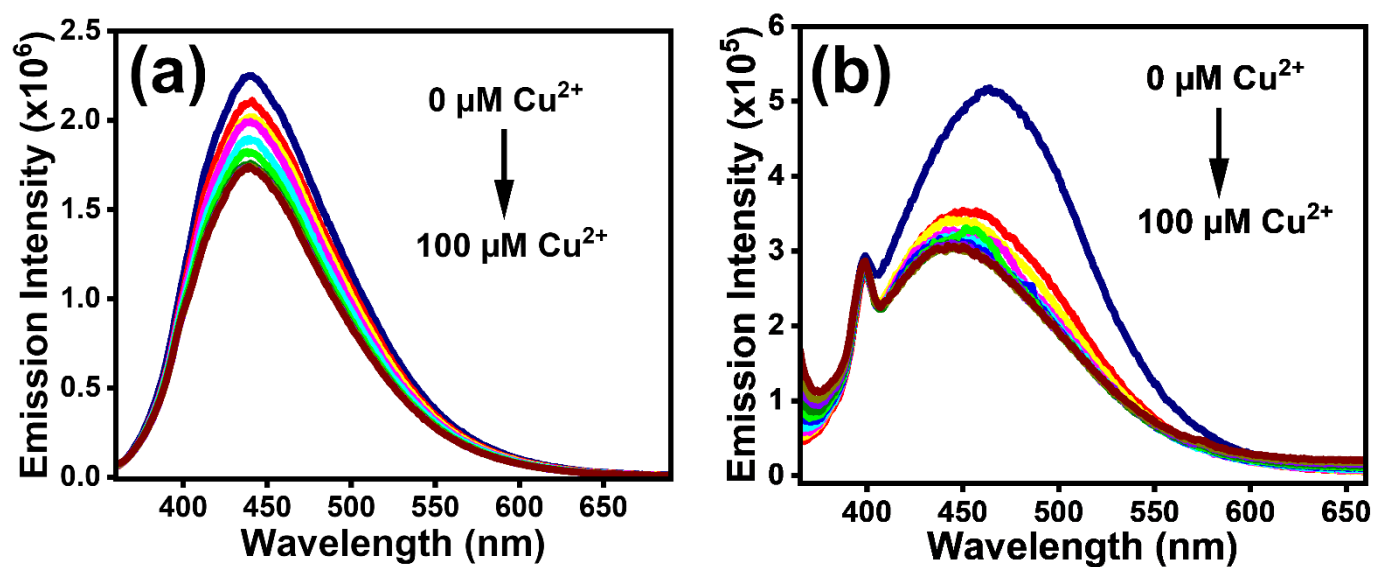

**Fig. S17** Variation in emission intensity of [1] against  $\text{Cu}^{2+}$  ions with (a) pond water sample and (b) tap water sample.
